# Supplementary material
Source: publisher figshare collection journal article supplement (https://acs.figshare.com/ndownloader/files/4954663)
Supplement: Supplementary file 1 [file 4954663]

## Supporting Information

### ***In Vivo* Tracking of Phagocytic Immune Cells using a Dual Imaging Probe with Gadolinium-enhanced MRI and Near-infrared Fluorescence**

*Eun-Joong Kim,<sup>†,¶</sup> Sankarprasad Bhuniya,<sup>‡,§,¶</sup> Hyunseung Lee,<sup>†</sup> Hyun Min Kim,<sup>†</sup> Weon Sup Shin,<sup>||</sup> Jong  
Seung Kim,<sup>||,\*</sup> and Kwan Soo Hong<sup>†,⊥,\*</sup>*

<sup>†</sup> Bioimaging Research Team, Korea Basic Science Institute, Cheongju 28119, Korea

<sup>‡</sup> Amrita Centre for Industrial Research & Innovation, Amrita University, Ettimadai, Coimbatore 641 112, India.

<sup>§</sup> Department of Chemical Engineering & Materials Science, Amrita University, Ettimadai, Coimbatore 641 112, India.

<sup>||</sup> Department of Chemistry, Korea University, Seoul 02841, Korea.

<sup>⊥</sup> Graduate School of Analytical Science and Technology, Chungnam National University, Daejeon 34134, Korea.

<sup>¶</sup> These authors equally contributed to this work

<sup>\*</sup> To whom correspondence should be addressed.

E-mail: [kshong@kbsi.re.kr](mailto:kshong@kbsi.re.kr) (K.S.Hong) and [jongskim@korea.ac.kr](mailto:jongskim@korea.ac.kr) (J.S.Kim).

Tel: +82 43 240 5100

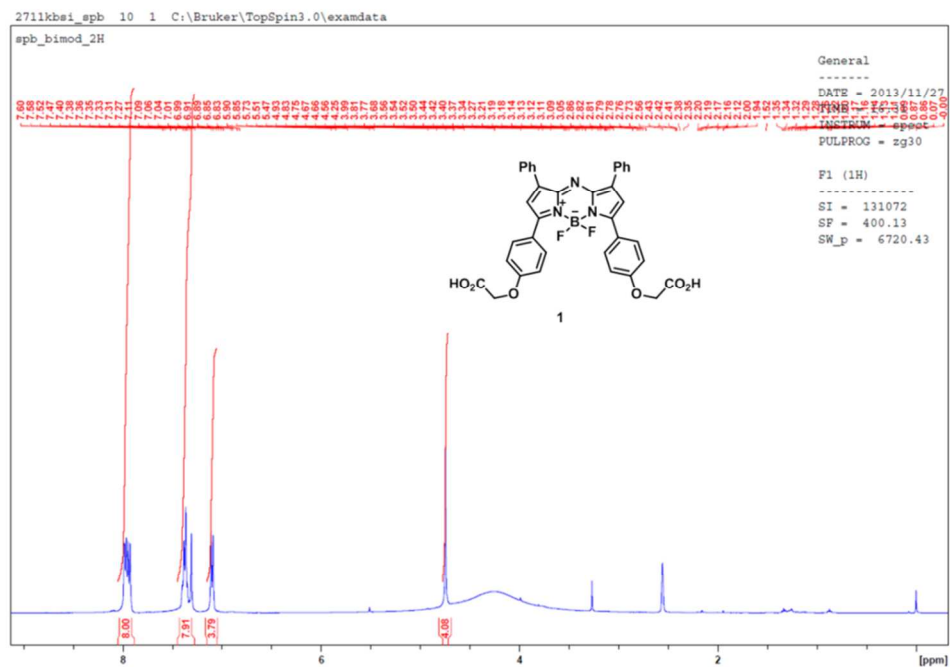

**Figure S1.**  $^1\text{H}$ -NMR spectrum of 1 in  $\text{DMSO-d}_6$ .

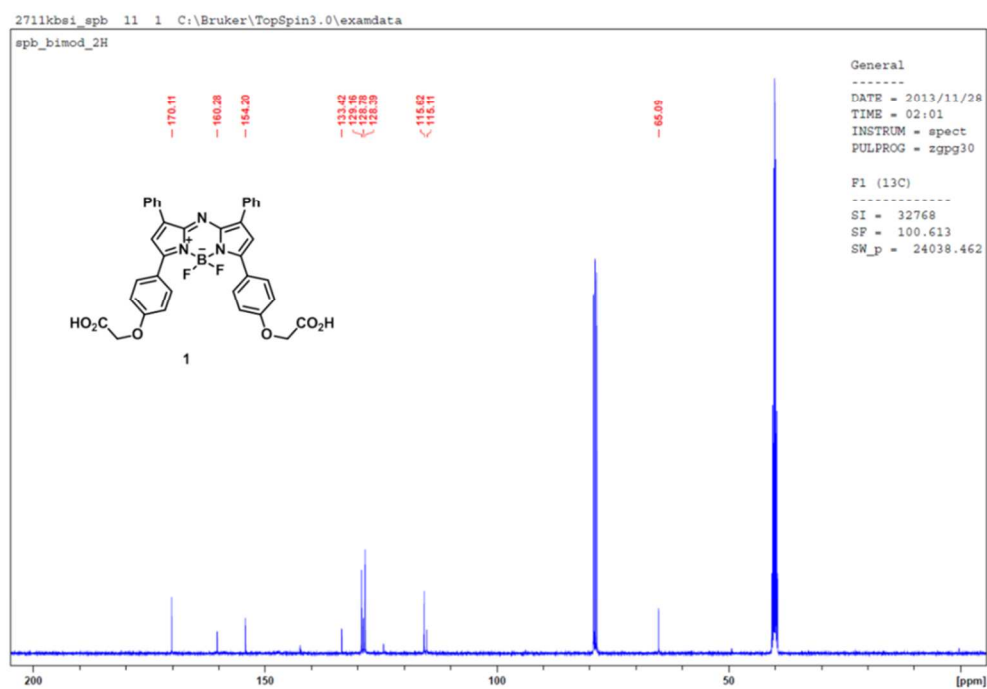

**Figure S2.**  $^{13}\text{C}$ -NMR spectrum of 1 in  $\text{DMSO-d}_6$  and  $\text{CDCl}_3$ .

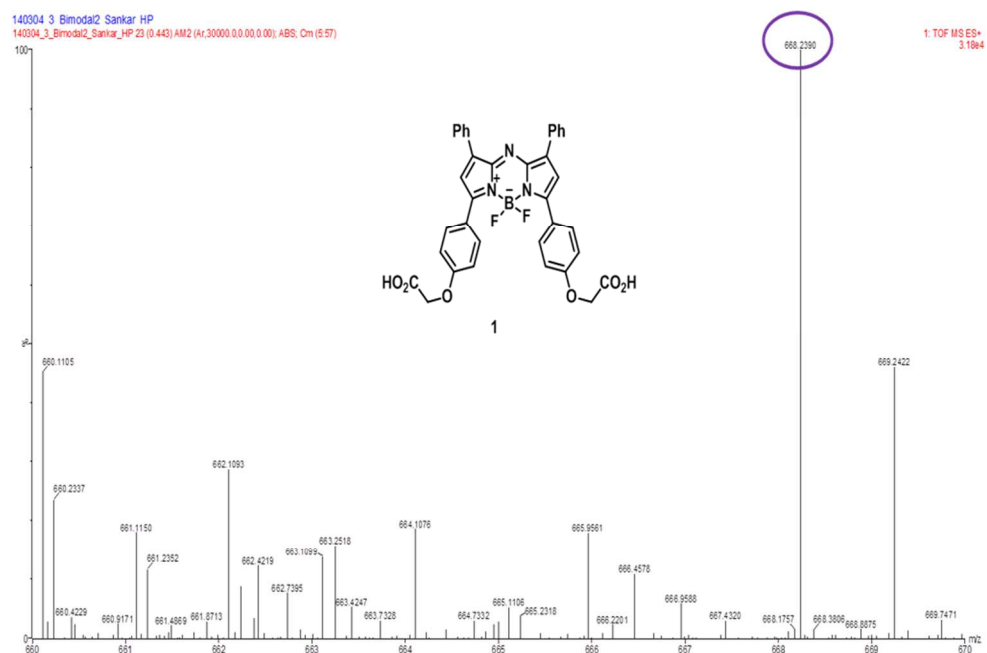

**Figure S3.** MS spectrum of **1**.

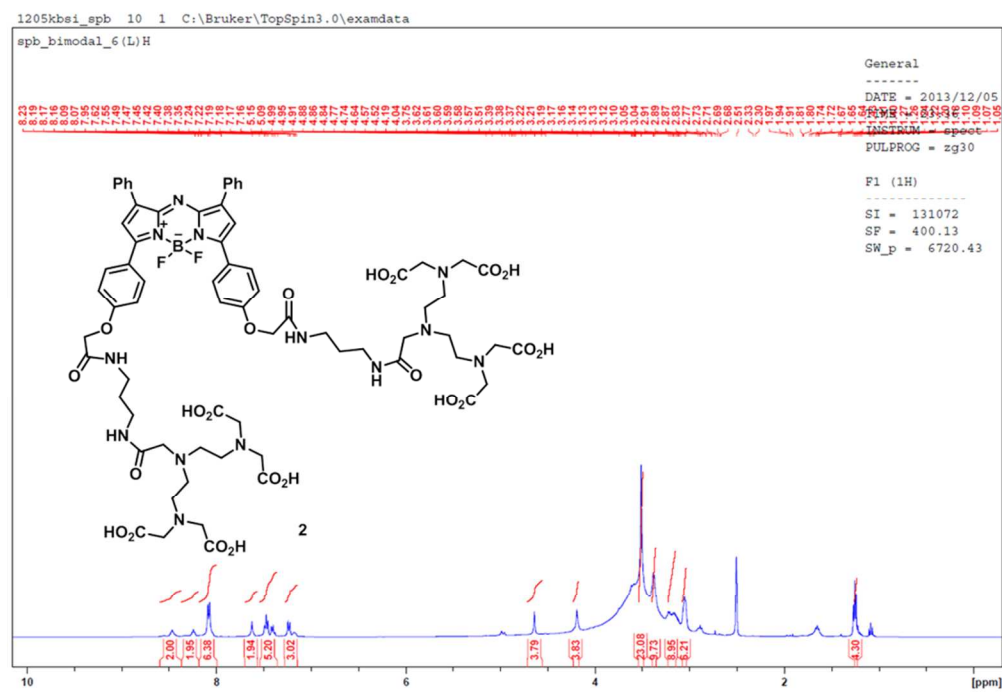

**Figure S4.**  $^1\text{H}$ -NMR spectrum of **2** in  $\text{DMSO-d}_6$ .

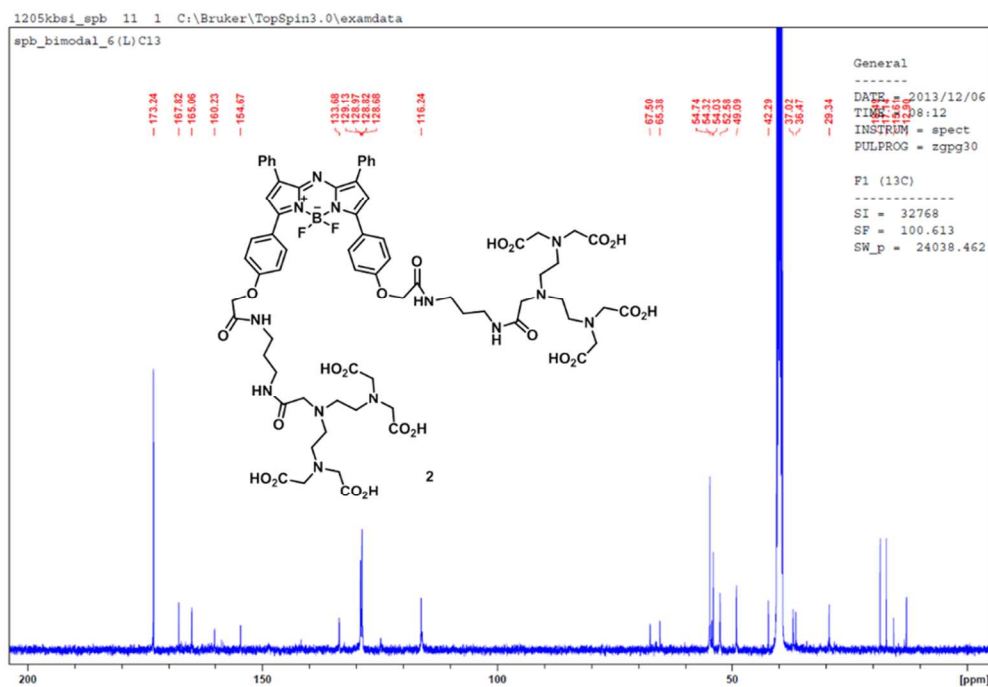

Figure S5.  $^{13}\text{C}$ -NMR spectrum of 2 in  $\text{DMSO-d}_6$ .

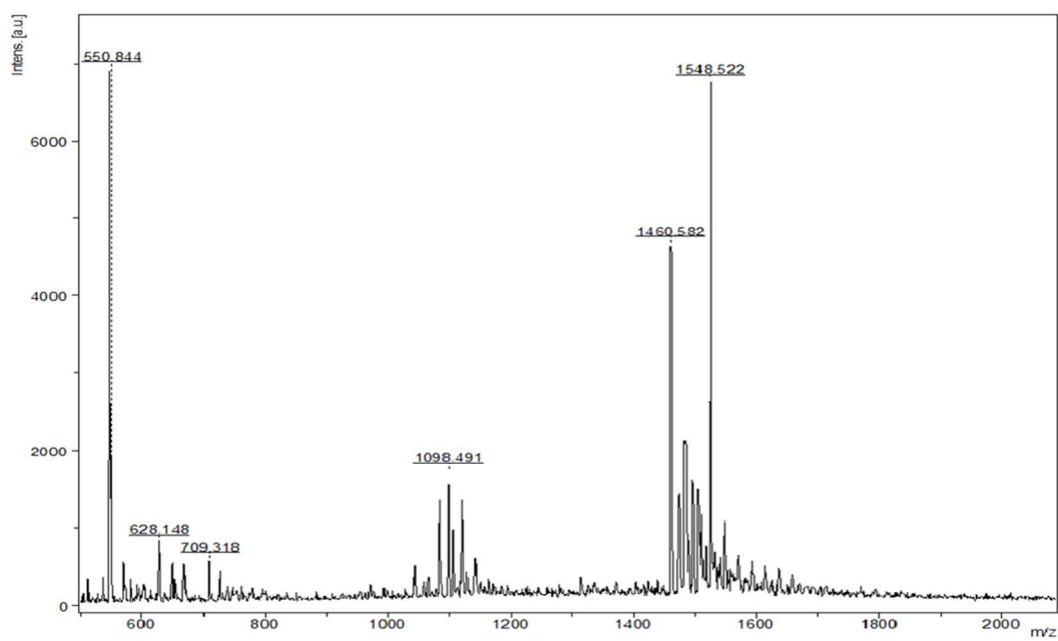

Figure S6. MALDI-MS of 2.

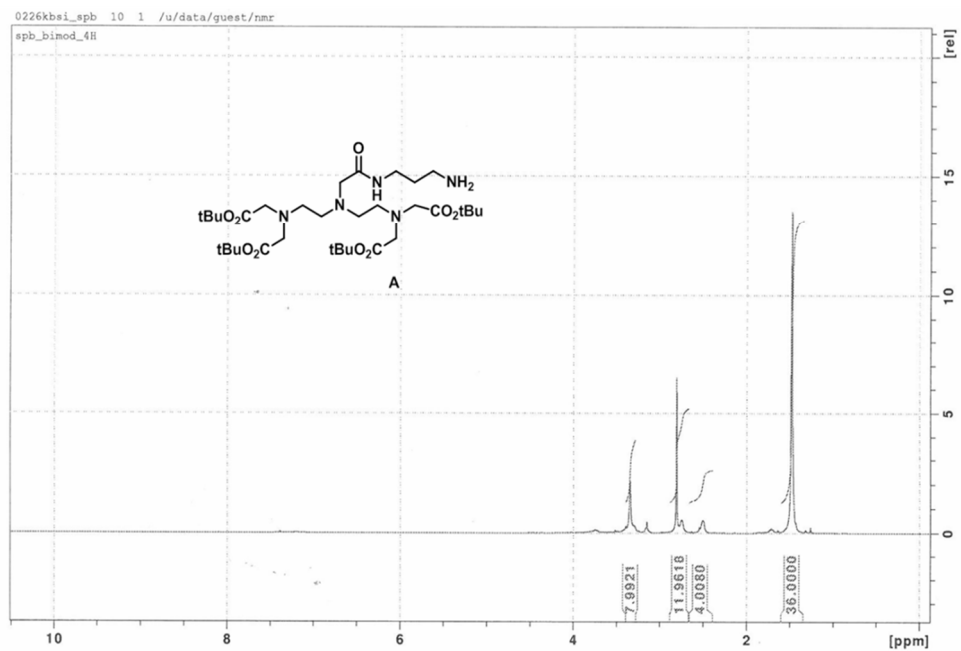

**Figure S7.** <sup>1</sup>H-NMR spectrum of **a** in CDCl<sub>3</sub>.

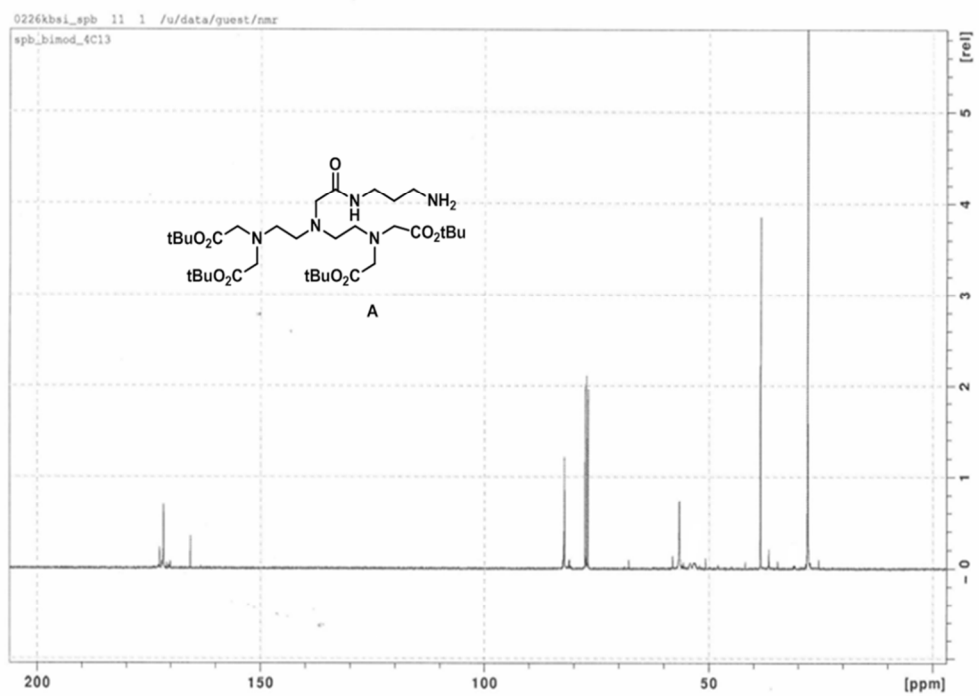

**Figure S8.** <sup>13</sup>C-NMR spectrum of **a** in CDCl<sub>3</sub>.

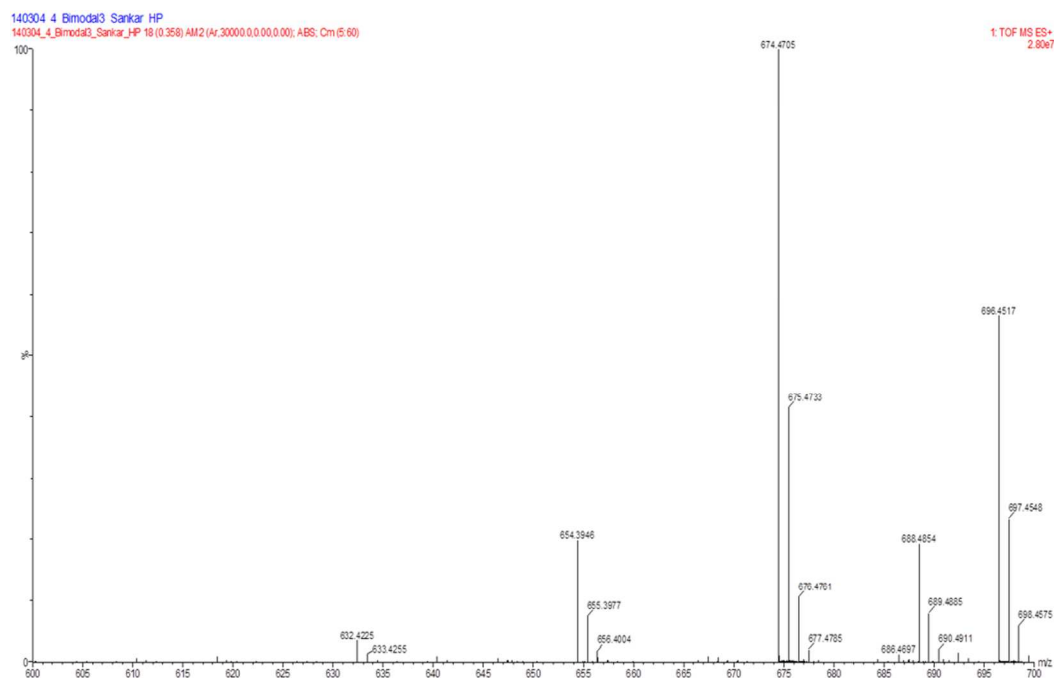

**Figure S9.** MS-spectrum of **a**.

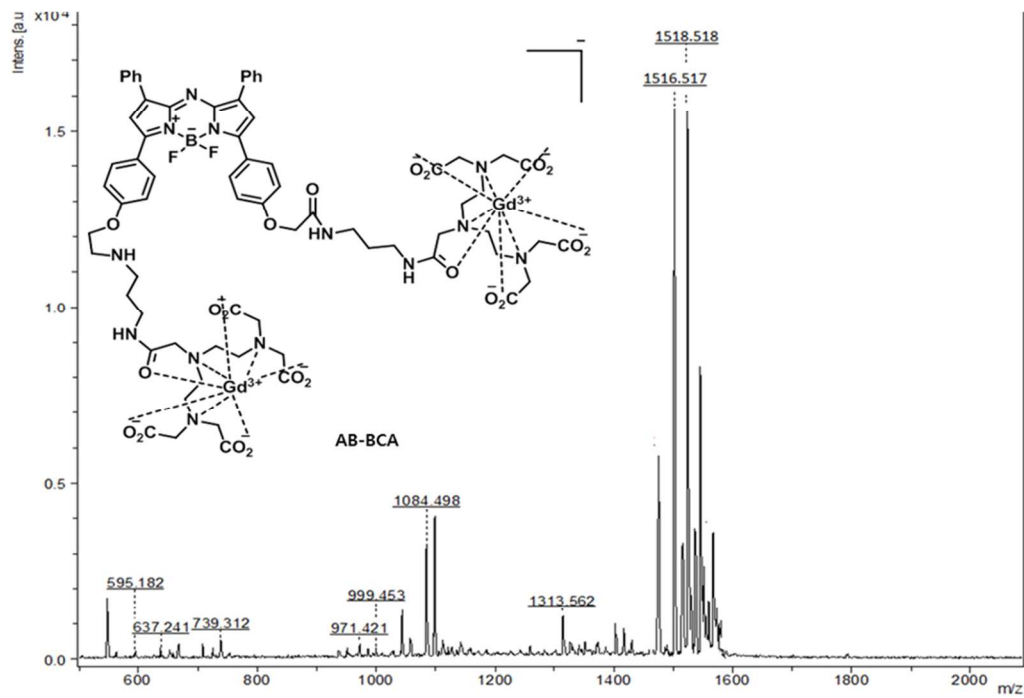

**Figure S10.** MALDI-MS of  $\text{Gd}^{3+}$  complex (AB-BCA).

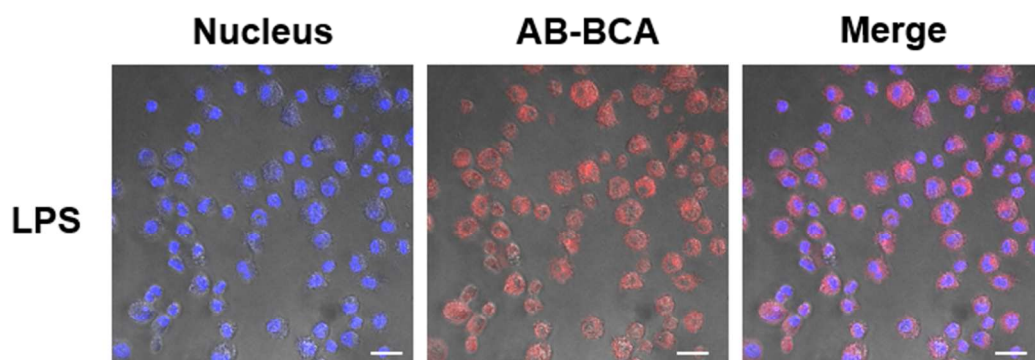

**Figure S11.** Morphological properties of matured BMDCs labeled with AB-BCA. BMDCs were labeled with 10  $\mu$ M of AB-BCA for 4 h, and incubated with LPS for 24 h. Differential interference contrast (DIC) images were acquired using a confocal microscope. All images show nuclear counterstain using Hoechst (blue). Scale bar: 20  $\mu$ m.

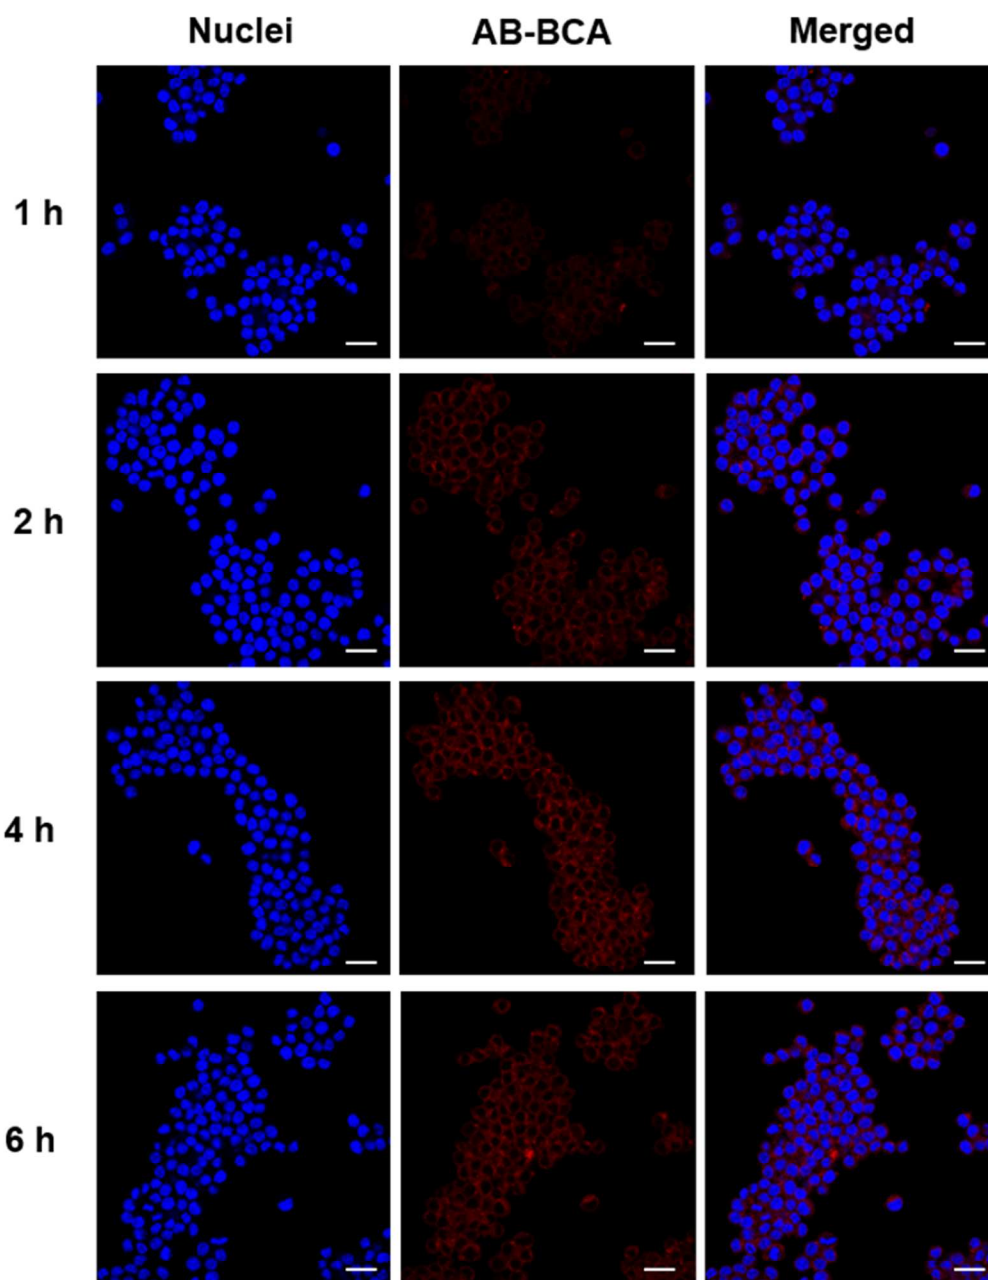

**Figure S12.** The Cellular fluorescence images of AB-BCA-treated Raw264.7 cells. Cells were treated with 10  $\mu$ M of AB-BCA for various time points. Then, cells were fixed in 4% paraformaldehyde after washing in PBS. All images show nuclear counterstain using Hoechst (blue). Scale bar: 20  $\mu$ m.



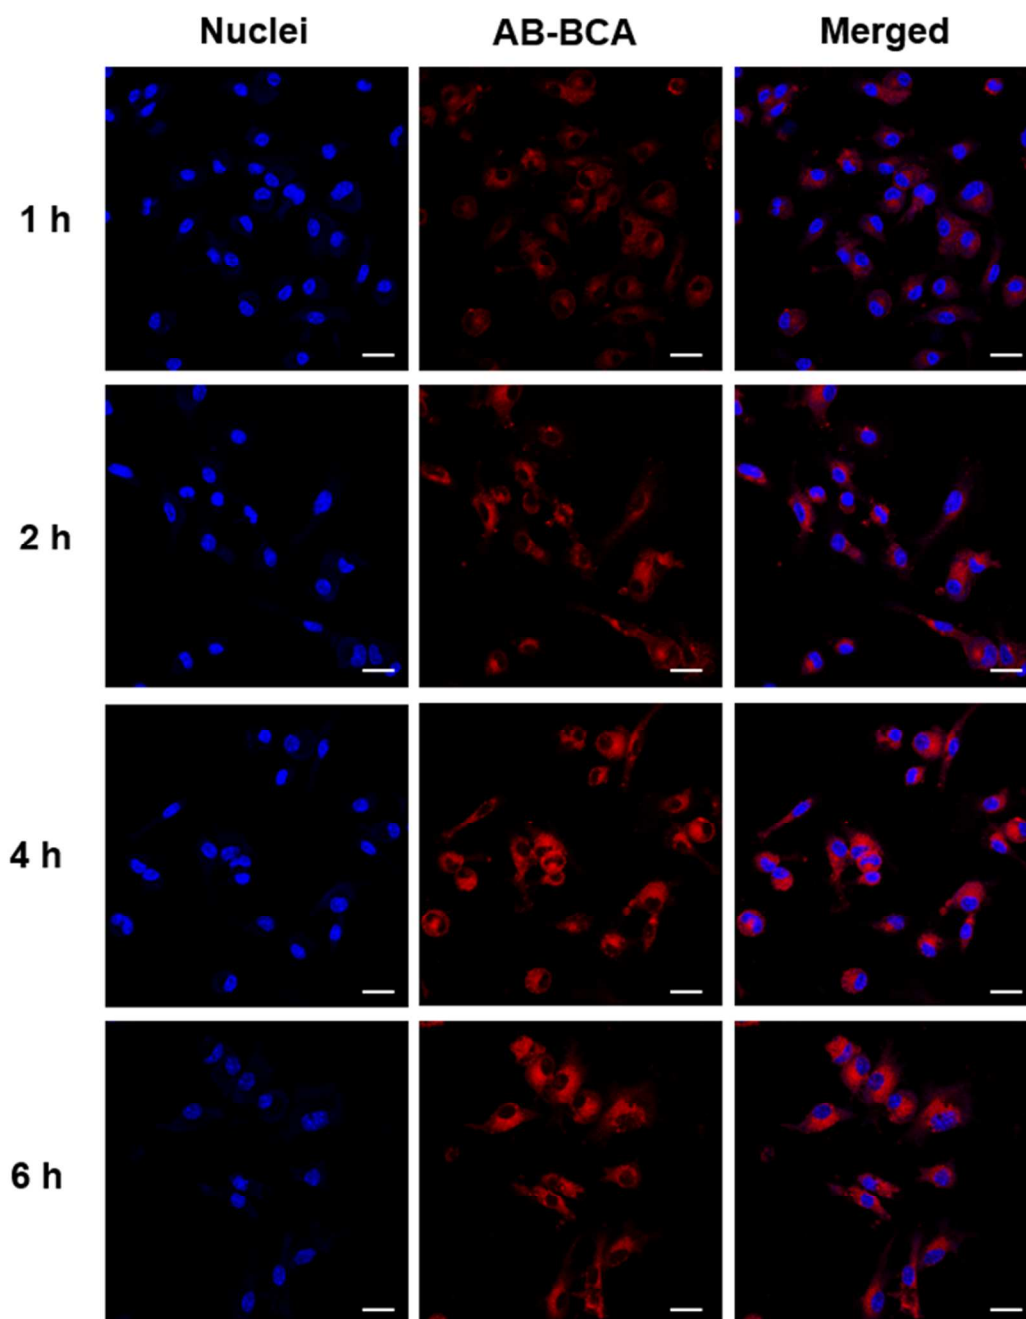

**Figure S13.** The Cellular fluorescence images of AB-BCA-treated BMDC cells. Cells were treated with 10  $\mu$ M of AB-BCA for various time points. Then, cells were fixed in 4% paraformaldehyde after washing in PBS. All images show nuclear counterstain using Hoechst (blue). Scale bar: 20  $\mu$ m.

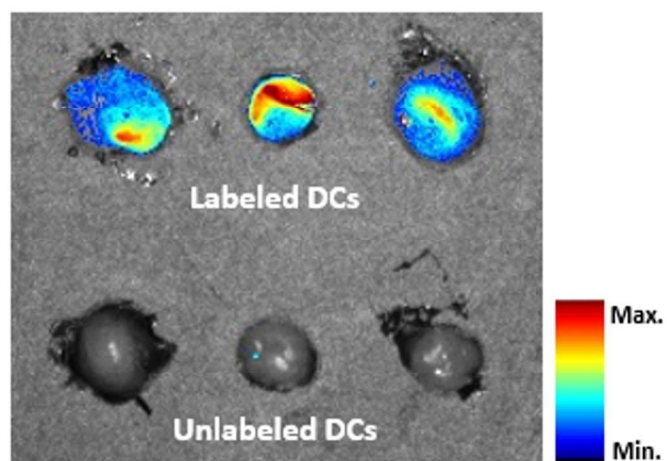

**Figure S14.** *Ex vivo* fluorescence image of lymph nodes from mice administered with AB-BCA. BMDCs unlabeled or labeled with AB-BCA were injected into the footpads of mice. After 48 h, LNs were excised and imaged by a Maestro II *in vivo* imaging system.
